# Supplementary material
Source: Springer Nature journal article supplement (https://www.springermedizin.de/resource/supplementary/12879_2013_2544_MOESM1_ESM.pdf/9444812)

# Study Periods

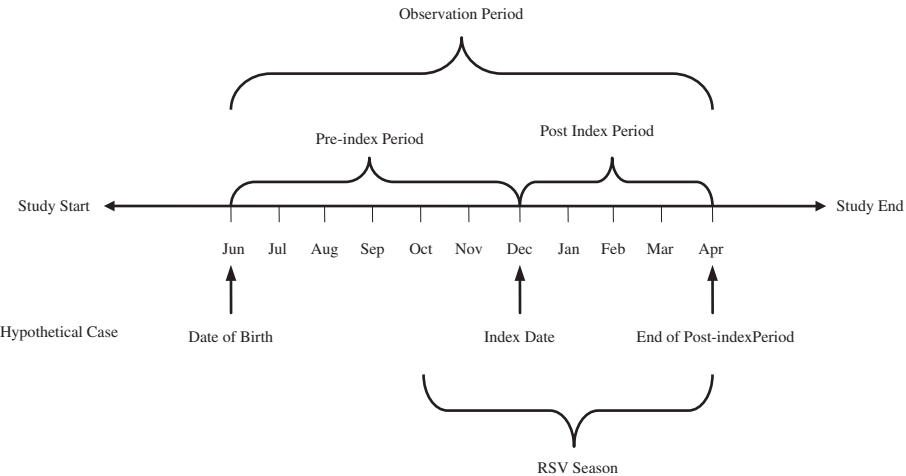

Supplement: MOESM1 [file 9444812]
